# Supplementary material for: Are Clean Eating Blogs a Source of Healthy Recipes? A Comparative Study of the Nutrient Composition of Foods with and without Clean Eating Claims
Source: PubMed Central journal article supplement (PMC6213725; doi:10.3390/nu10101440), 2018-10-05
Supplement: nutrients-10-01440-s001.pdf [file nutrients-10-01440-s001.pdf]

**Supplementary Table 1: Top ranking ingredients according to recipe category among clean and control recipes**

| Breakfast (n=11)       |   |                          | Snacks (n=29)     |    |                          | Smoothie (n=10)      |   |                          | Dessert (n=11)        |   |                          | Treat (n=25)    |    | Overall (n=86)           |                 |    |                          |
|------------------------|---|--------------------------|-------------------|----|--------------------------|----------------------|---|--------------------------|-----------------------|---|--------------------------|-----------------|----|--------------------------|-----------------|----|--------------------------|
| Ingredient Name        | n | % of recipes in category | Ingredient Name   | n  | % of recipes in category | Ingredient Name      | n | % of recipes in category | Ingredient Name       | n | % of recipes in category | Ingredient Name | n  | % of recipes in category | Ingredient Name | n  | % of recipes in category |
| <b>Clean Recipes</b>   |   |                          |                   |    |                          |                      |   |                          |                       |   |                          |                 |    |                          |                 |    |                          |
| Oats                   | 7 | 64%                      | Egg Baking powder | 15 | 52%                      | Honey                | 4 | 40%                      | Vanilla extract       | 5 | 45%                      | Nuts            | 13 | 52%                      | Coconut oil     | 29 | 34%                      |
| Honey                  | 5 | 45%                      |                   | 14 | 48%                      | Banana Fresh berries | 3 | 30%                      | Cinnamon              | 4 | 36%                      | Chocolate       | 11 | 44%                      | Salt            | 27 | 31%                      |
| Coconut oil            | 4 | 36%                      | Salt              | 13 | 45%                      | Cucumber             | 3 | 30%                      | Nuts                  | 4 | 36%                      | Salt            | 11 | 44%                      | Honey           | 29 | 34%                      |
| Cinnamon               | 4 | 36%                      | Coconut oil       | 13 | 45%                      | Orange juice         | 2 | 20%                      | Cacao                 | 3 | 27%                      | Honey           | 10 | 40%                      | Nuts            | 27 | 31%                      |
| Fresh berries          | 4 | 36%                      | Nuts              | 10 | 34%                      | Avocado              | 2 | 20%                      | Maple syrup           | 3 | 27%                      | Coconut oil     | 10 | 40%                      | Egg             | 18 | 21%                      |
| Banana                 | 4 | 36%                      | Oats              | 10 | 34%                      | Spinach              | 2 | 20%                      | Apple                 | 3 | 27%                      | Maple syrup     | 8  | 32%                      | Oats            | 17 | 20%                      |
| Coconut milk           | 3 | 27%                      | Honey             | 10 | 34%                      | Apple Protein powder | 2 | 20%                      | Coconut oil           | 2 | 18%                      | Cacao           | 7  | 28%                      | Chocolate       | 13 | 15%                      |
| Almond milk            | 3 | 27%                      | Spices            | 11 | 38%                      | Almond               | 2 | 20%                      | Chocolate             | 2 | 18%                      | Butter          | 7  | 28%                      | Coconut milk    | 11 | 13%                      |
| Eggs                   | 3 | 27%                      | Vegetable oil     | 6  | 21%                      | Milk                 | 2 | 20%                      | Coconut milk          | 2 | 18%                      | Coconut milk    | 6  | 24%                      | Maple syrup     | 11 | 13%                      |
| Salt                   | 3 | 27%                      | Peanut butter     | 6  | 21%                      |                      |   |                          | Evaporated cane sugar | 2 | 18%                      | Coconut sugar   | 6  | 24%                      | Cacao           | 10 | 12%                      |
| <b>Control Recipes</b> |   |                          |                   |    |                          |                      |   |                          |                       |   |                          |                 |    |                          |                 |    |                          |
| Oats                   | 8 | 73%                      | Flour             | 23 | 79%                      | Banana               | 7 | 70%                      | Butter                | 7 | 64%                      | Butter          | 17 | 68%                      | Butter          | 50 | 58%                      |
| Cow's milk             | 7 | 64%                      | Butter            | 23 | 79%                      | Yoghurt              | 6 | 60%                      | White sugar           | 6 | 55%                      | Flour           | 12 | 48%                      | Flour           | 41 | 48%                      |
| Brown Sugar            | 6 | 55%                      | Egg               | 21 | 72%                      | Honey                | 6 | 60%                      | Brown sugar           | 6 | 55%                      | Brown sugar     | 12 | 48%                      | Brown Sugar     | 40 | 47%                      |
| Apple                  | 5 | 45%                      | Brown Sugar       | 16 | 55%                      | Water                | 6 | 60%                      | Flour                 | 6 | 55%                      | White sugar     | 11 | 44%                      | Eggs            | 37 | 43%                      |
| Cinnamon               | 4 | 36%                      | Baking powder     | 12 | 41%                      | Fresh berries        | 4 | 40%                      | Vanilla extract       | 5 | 45%                      | Chocolate       | 11 | 44%                      | White sugar     | 25 | 29%                      |
| Fresh berries          | 4 | 36%                      | Cows milk         | 11 | 38%                      | Cow's milk           | 4 | 40%                      | Egg                   | 5 | 45%                      | Eggs            | 11 | 44%                      | Cow's milk      | 22 | 26%                      |
| Banana                 | 4 | 36%                      | Nuts              | 10 | 34%                      | Avocado              | 2 | 20%                      | Cream                 | 5 | 45%                      | Nuts            | 10 | 40%                      | Nuts            | 20 | 23%                      |
| Salt                   | 3 | 27%                      | White sugar       | 8  | 28%                      | Spinach              | 2 | 20%                      | Cocoa powder          | 5 | 45%                      | Vanilla extract | 9  | 36%                      | Vanilla extract | 14 | 16%                      |
| Honey                  | 3 | 27%                      | Cinnamon          | 6  | 21%                      | Peach Nut butter     | 2 | 20%                      | Apple                 | 4 | 36%                      | Cocoa Powder    | 6  | 24%                      | Chocolate       | 15 | 17%                      |
| Butter                 | 3 | 27%                      | Chocolate         | 4  | 14%                      |                      |   |                          | Cinnamon              | 3 | 27%                      | Coconut         | 5  | 20%                      | Cinnamon        | 13 | 15%                      |
